# Supplementary material
Source: publisher figshare collection journal article supplement (https://asha.figshare.com/articles/dataset/_/22688125)
Supplement: Supplementary file 1 [file 1]

## Supplemental Material S6. Y04 brief interview transcription.

| Pt. ID                                              | Y04                                                                                                            |
|-----------------------------------------------------|----------------------------------------------------------------------------------------------------------------|
| <b>Pre-Yoga Questions</b>                           |                                                                                                                |
| How do you feel about yoga?                         | I feel good about yoga. It makes your body feel relaxed.                                                       |
| Why do you want to participate in a yoga program?   | I want to be relaxed and feel at ease.                                                                         |
| Do you think yoga can help you?                     | Yes                                                                                                            |
| If yes, how can yoga help you?                      | It will help me relax. If I'm having a [bad] day. I think about the exercises... I can be here and mellow out. |
| <b>Post-Yoga Questions</b>                          |                                                                                                                |
| How do you feel about yoga now?                     | Very good.                                                                                                     |
| What do you like about yoga?                        | Seeing other people, doing relax stuff and chilling out.                                                       |
| Are there things you do not like about yoga?        | Nothing.                                                                                                       |
| Did yoga help you?                                  | Yes                                                                                                            |
| If yes, how did yoga help?                          | Taught me how to chill out, relax, and not sweat the small stuff.                                              |
| Will you keep doing yoga?                           | Yes                                                                                                            |
| Did yoga help you meet your goals for this program? | Yes                                                                                                            |
| If yes, how did yoga help?                          | Just chilling out and not getting snappy. Just chilling out. Got better at going with the flow.                |
