# Supplementary material
Source: publisher figshare collection journal article supplement (https://asha.figshare.com/articles/dataset/_/22688125)
Supplement: Supplementary file 3 [file 1]

## Supplemental Material S10. Y09 brief interview transcription.

| Pt. ID                                              | Y09                                                                                                                                                                           |
|-----------------------------------------------------|-------------------------------------------------------------------------------------------------------------------------------------------------------------------------------|
| <b>Pre-Yoga Questions</b>                           |                                                                                                                                                                               |
| How do you feel about yoga?                         | Pretty good... it's relaxing.                                                                                                                                                 |
| Why do you want to participate in a yoga program?   | Stretching and music, oh, therapy and ... tingly. Yoga stretching is nice.                                                                                                    |
| Do you think yoga can help you?                     | Yes                                                                                                                                                                           |
| If yes, how can yoga help you?                      | Lots, lots of people. Relax, flexible, flexible arms, loosening arms ... my shoulders.                                                                                        |
| <b>Post-Yoga Questions</b>                          |                                                                                                                                                                               |
| How do you feel about yoga now?                     | I am relaxed. I like feeling great and [there are] other[s]. It makes you happy.                                                                                              |
| What do you like about yoga?                        | I love yoga.                                                                                                                                                                  |
| Are there things you do not like about yoga?        | Nothing at all. Well, this one (put hands together, showing how his right hand doesn't come together with his left; he didn't like that pose).                                |
| Did yoga help you?                                  | Yes                                                                                                                                                                           |
| If yes, how did yoga help?                          | It helped a lot. Relaxed and [not] tense, um, relaxed.                                                                                                                        |
| Will you keep doing yoga?                           | Yes                                                                                                                                                                           |
| Did yoga help you meet your goals for this program? | Yes                                                                                                                                                                           |
| If yes, how did yoga help?                          | [Participant needed help thinking of his goals – he was reminded of his goals] Indicated improved focus and strength. Reported positive changes in breathing and flexibility. |
