# Supplementary material
Source: publisher figshare collection journal article supplement (https://asha.figshare.com/articles/dataset/_/22688125)
Supplement: Supplementary file 5 [file 1]

## Supplemental Material S7. Y05 brief interview transcription.

| Pt. ID                                              | Y05                                                                                                                                                                                                                                                                                                                                                                                                                                                                                                        |
|-----------------------------------------------------|------------------------------------------------------------------------------------------------------------------------------------------------------------------------------------------------------------------------------------------------------------------------------------------------------------------------------------------------------------------------------------------------------------------------------------------------------------------------------------------------------------|
| <b>Pre-Yoga Questions</b>                           |                                                                                                                                                                                                                                                                                                                                                                                                                                                                                                            |
| How do you feel about yoga?                         | I feel positive, there are untold benefits of yoga.                                                                                                                                                                                                                                                                                                                                                                                                                                                        |
| Why do you want to participate in a yoga program?   | Learning, participating, experience health benefits, all good things.                                                                                                                                                                                                                                                                                                                                                                                                                                      |
| Do you think yoga can help you?                     | Yes                                                                                                                                                                                                                                                                                                                                                                                                                                                                                                        |
| If yes, how can yoga help you?                      | Being moment, quickly present, quiet pain management, being in a moment quickly... the ground, breathing, peaceful place.                                                                                                                                                                                                                                                                                                                                                                                  |
| <b>Post-Yoga Questions</b>                          |                                                                                                                                                                                                                                                                                                                                                                                                                                                                                                            |
| How do you feel about yoga now?                     | It's critical. I'm excited to be here. Smiling faces, [...]relaxation, meditation, full around conversation, positive, all good.                                                                                                                                                                                                                                                                                                                                                                           |
| What do you like about yoga?                        | Sharing classic principles. The world is chaotic, um, high-stress, high-anxiety, um, main function yoga coming back, keeping simple, grounded, be present.                                                                                                                                                                                                                                                                                                                                                 |
| Are there things you do not like about yoga?        | The clock, expired uh, yoga!                                                                                                                                                                                                                                                                                                                                                                                                                                                                               |
| Did yoga help you?                                  | Yes                                                                                                                                                                                                                                                                                                                                                                                                                                                                                                        |
| If yes, how did yoga help?                          | Relaxing meditation, breathing, holding fast, it's like, uh, escape- my pain, my pain. Relaxed, keep breathing, center ground, my heart, lungs, gratitude, back again. It's like escape.                                                                                                                                                                                                                                                                                                                   |
| Will you keep doing yoga?                           | Yes                                                                                                                                                                                                                                                                                                                                                                                                                                                                                                        |
| Did yoga help you meet your goals for this program? | Yes                                                                                                                                                                                                                                                                                                                                                                                                                                                                                                        |
| If yes, how did yoga help?                          | Level, my goal, level lowered, relaxation. Centeredness, for example, brain interface, experimental program, my brain cap, cerebellum, motor cortex, nothing, relax. My brain, cutting relax, flat line. My technician, wow, relax, boom. (Administrator: clarified what he meant by experimental program)<br>Yeah, monitoring brain interface program, cap. A little sensitive brain waves, neat program. Yeah um, my technician, wow, brain waves coming down, yes because of yoga. I'm practicing yoga. |
