# Supplementary material
Source: publisher figshare collection journal article supplement (https://asha.figshare.com/articles/dataset/_/22688125)
Supplement: Supplementary file 6 [file 1]

## Supplemental Material S4. Y02 brief interview transcription.

| Pt. ID                                              | Y02                                                                                                                                                       |
|-----------------------------------------------------|-----------------------------------------------------------------------------------------------------------------------------------------------------------|
| <b>Pre-Yoga Questions</b>                           |                                                                                                                                                           |
| How do you feel about yoga?                         | Great!                                                                                                                                                    |
| Why do you want to participate in a yoga program?   | I used to work on yoga for years, but I don't have the opportunity now.                                                                                   |
| Do you think yoga can help you?                     | Yes                                                                                                                                                       |
| If yes, how can yoga help you?                      | It relaxes everyone. More importantly ... [can reduce] pain                                                                                               |
| <b>Post-Yoga Questions</b>                          |                                                                                                                                                           |
| How do you feel about yoga now?                     | I always like yoga, whether it's working and doing in a yoga studio or the tempo, or on the computer. I like that, all the time.                          |
| What do you like about yoga?                        | Helps me to relax, and stay calm myself, and unfortunately, it's not a lot of exercise, but being able to stretch and stuff, that's very good.            |
| Are there things you do not like about yoga?        | I like the in-person yoga in places like the Wah Lum temple, places like that, I like doing it on the ground with a mat and real, like warrior positions. |
| Did yoga help you?                                  | Yes                                                                                                                                                       |
| If yes, how did yoga help?                          | It helps me stay calm and a little bit of motion and stretching and things like that. Helped me have less stress, for sure.                               |
| Will you keep doing yoga?                           | Yes                                                                                                                                                       |
| Did yoga help you meet your goals for this program? | Yes                                                                                                                                                       |
| If yes, how did yoga help?                          | [. . .] exercises                                                                                                                                         |
