# Supplementary material
Source: publisher figshare collection journal article supplement (https://asha.figshare.com/articles/dataset/_/22688125)
Supplement: Supplementary file 7 [file 1]

**Supplemental Material S3.** Comparisons of group means and effect sizes pre- vs. post-yoga.

| Measure                         | Pre   | Post  | Cohen’s $d^a$ | Effect Size |
|---------------------------------|-------|-------|---------------|-------------|
| UW Resilience Scale             | 29.71 | 35.00 | +0.818        | Large       |
| Modified Perceived Stress Scale | 16.71 | 11.57 | −0.571        | Medium      |
| PROMIS Sleep Disturbance        | 21.14 | 16.43 | −0.535        | Medium      |
| PROMIS Pain Interference        | 22.75 | 19.50 | −0.300        | Small       |
| CAT Word Fluency                | 20.57 | 21.43 | +0.172        | —           |
| CAT Naming (Object and Action)* | 48.71 | 49.57 | +0.155        | —           |

<sup>a</sup> $d \geq 0.2$  small, 0.5 medium, 0.8 large

\*Small effect (+0.438) of action naming when analyzed separately (means: pre = 5.57; post = 6.71)
