# Supplementary material
Source: publisher figshare collection journal article supplement (https://asha.figshare.com/articles/dataset/_/22688125)
Supplement: Supplementary file 8 [file 1]

## Supplemental Material S5. Y03 brief interview transcription.

| Pt. ID                                              | Y03                                                                                                                                                |
|-----------------------------------------------------|----------------------------------------------------------------------------------------------------------------------------------------------------|
| <b>Pre-Yoga Questions</b>                           |                                                                                                                                                    |
| How do you feel about yoga?                         | I think yoga helps a lot with everything, in mind and body.                                                                                        |
| Why do you want to participate in a yoga program?   | I would love to help and research and want to be part of knowledge about myself.                                                                   |
| Do you think yoga can help you?                     | Yes                                                                                                                                                |
| If yes, how can yoga help you?                      | Relaxing.                                                                                                                                          |
| <b>Post-Yoga Questions</b>                          |                                                                                                                                                    |
| How do you feel about yoga now?                     | I love it, I love coming, I want to continue, I would love to continue.                                                                            |
| What do you like about yoga?                        | Everything, I like the people, the facilitator. The group, oh my gosh, I feel very comfortable.                                                    |
| Are there things you do not like about yoga?        | No, I like it, I don't have nothing negative.                                                                                                      |
| Did yoga help you?                                  | Yes                                                                                                                                                |
| If yes, how did yoga help?                          | I feel more connected with myself.                                                                                                                 |
| Will you keep doing yoga?                           | Yes                                                                                                                                                |
| Did yoga help you meet your goals for this program? | Yes                                                                                                                                                |
| If yes, how did yoga help?                          | One of my goals is to accept myself with this aphasia, and I feel more comfortable. [Administrator: Was yoga helpful with self-acceptance] Oh yes. |
