# Supplementary material
Source: publisher figshare collection journal article supplement (https://asha.figshare.com/articles/dataset/_/22688125)
Supplement: Supplementary file 9 [file 1]

## Supplemental Material S9. Y07 brief interview transcription.

| Pt. ID                                              | Y07                                                                                                                                                                                                                                                                                               |
|-----------------------------------------------------|---------------------------------------------------------------------------------------------------------------------------------------------------------------------------------------------------------------------------------------------------------------------------------------------------|
| <b>Pre-Yoga Questions</b>                           |                                                                                                                                                                                                                                                                                                   |
| How do you feel about yoga?                         | I would like to get back into doing yoga, even though I know I have limitations, getting dizzy, being off-balance. I am positive about yoga because of its health benefits... Overall, I feel positive about it.                                                                                  |
| Why do you want to participate in a yoga program?   | I researched all the health benefits (such as flexibility) and I used to do yoga at least an hour daily before my accident.                                                                                                                                                                       |
| Do you think yoga can help you?                     | Yes                                                                                                                                                                                                                                                                                               |
| If yes, how can yoga help you?                      | Yoga can make me calm, because my depression and anxiety are at an all-time high due to permanent brain damage [...] breathing in yoga can help me.                                                                                                                                               |
| <b>Post-Yoga Questions</b>                          |                                                                                                                                                                                                                                                                                                   |
| How do you feel about yoga now?                     | I always knew it would help me. I always agree with yoga.                                                                                                                                                                                                                                         |
| What do you like about yoga?                        | I really like the relaxation and breathing, and movement with that. I like everything about [yoga]. I know that this helps me best deal with stress and everything.                                                                                                                               |
| Are there things you do not like about yoga?        | I like everything about yoga, especially like the yoga classes and I get to talk to people, I don't get much interaction especially after the stroke, um, so it's a good way for me to hear the teacher and I can relax and the camaraderie of the stroke survivors, and yeah, I like everything. |
| Did yoga help you?                                  | Yes                                                                                                                                                                                                                                                                                               |
| If yes, how did yoga help?                          | Whenever something stresses me out, I don't run to [medication] first. I try to focus on my breathing and everything [...] that helps me calm down. I think that yoga helps me more than [medication].                                                                                            |
| Will you keep doing yoga?                           | Yes                                                                                                                                                                                                                                                                                               |
| Did yoga help you meet your goals for this program? | Yes                                                                                                                                                                                                                                                                                               |
| If yes, how did yoga help?                          | I want to use less Xanax and I did. I first think about, focus on the breath, not pop a Xanax.                                                                                                                                                                                                    |
