# Supplementary material
Source: publisher figshare collection journal article supplement (https://asha.figshare.com/articles/dataset/_/22688125)
Supplement: Supplementary file 10 [file 1]

## **Supplemental Material S2. Yoga teacher aphasia-friendly training.**

Prior to participation in this study, the yoga instructor met with the first author on multiple occasions to learn about aphasia and discuss recommended literature and completed a 90-minute training session at the UCF Aphasia House that is held annually for volunteers and led by an ASHA-certified speech-language pathologist and aphasiologist.

The training covered:

- defining aphasia and different presentations of aphasia
- impact of aphasia on psychosocial variables
- aphasia-friendly guidelines to support communication with PWA (e.g., use of simplified language, slow rate of speech, visual supports, strategies for repairing breakdowns, guidelines for aphasia-friendly written materials).

Following this training, the yoga teacher attended two virtual aphasia community events that included the opportunity to interact with people with aphasia and lead a yoga session with support and feedback from the Director of the UCF Aphasia House, Amy Engelhoven (Director from May 2017–May 2022), and the first author.
